# Supplementary material for: Versisterol, a new endophytic steroid with 3CL protease inhibitory activity from Avicennia marina (Forssk.) Vierh.
Source: Royal Society of Chemistry journal article supplement (doi:10.1039/d2ra00877g), 2022-01-01
Supplement: d2ra00877g1.pdf [file d2ra00877g1.pdf]

**Versisterol, a new endophytic steroid with 3CL protease inhibitory activity**

Marwa Elsbaey<sup>a\*</sup>, Mahmoud A. A. Ibrahim<sup>b</sup>, Mohamed-Elamir F. Hegazy<sup>c</sup>

<sup>a</sup>Pharmacognosy Department, Faculty of Pharmacy, Mansoura University, Mansoura 35516, Egypt

<sup>b</sup>Computational Chemistry Laboratory, Chemistry Department, Faculty of Science, Minia University, Minia 61519, Egypt

<sup>c</sup>Chemistry of Medicinal Plants Department, National Research Centre, Giza 12622, Egypt

**\*Corresponding author:** Marwa Elsbaey, Department of Pharmacognosy, Faculty of Pharmacy, Mansoura University, 35516, Egypt

Email: [marwaelsebay1611@mans.edu.eg](mailto:marwaelsebay1611@mans.edu.eg)

Tel.: 00201005437480; Fax: +02(050)2247496

Address: Department of Pharmacognosy, Faculty of Pharmacy, Mansoura University, Mansoura 35516, Egypt

## Table of content

| <b>Content</b>                                                                               | <b>Page</b> |
|----------------------------------------------------------------------------------------------|-------------|
| Figure S1: $^1\text{H}$ -NMR spectrum of versisterol ( $\text{CD}_3\text{OD}$ , 600 MHz).    | 4           |
| Figure S2: $^{13}\text{C}$ -NMR spectrum of versisterol ( $\text{CD}_3\text{OD}$ , 150 MHz). | 5           |
| Figure S3: HSQC of versisterol.                                                              | 6           |
| Figure S4: HMBC of versisterol.                                                              | 7           |
| Figure S5: COSY of versisterol.                                                              | 8           |
| Figure S6: TCOZY of versisterol.                                                             | 9           |
| Figure S7: NOESY of versisterol.                                                             | 10          |
| Figure S8: Positive HRES-ESI mass spectrum of versisterol.                                   | 11          |

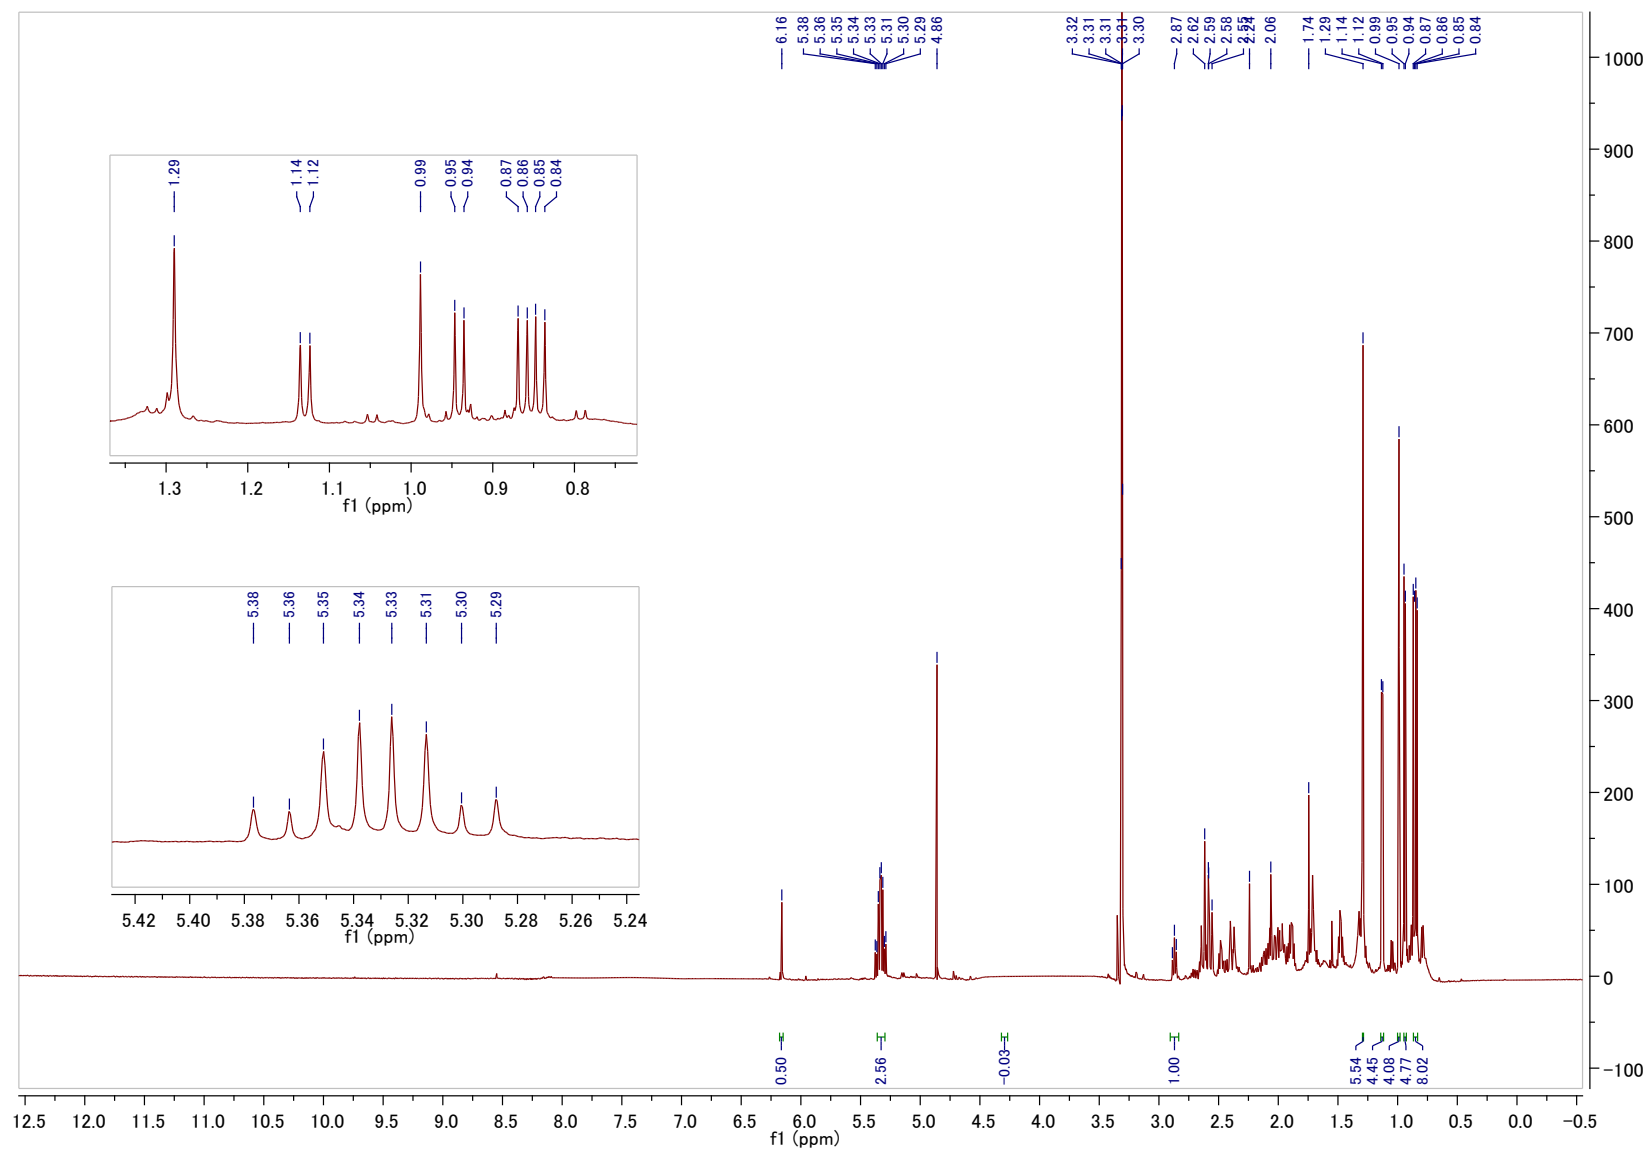

**Figure S1:  $^1\text{H-NMR}$  spectrum of versisterol ( $\text{CD}_3\text{OD}$ , 600 MHz).**

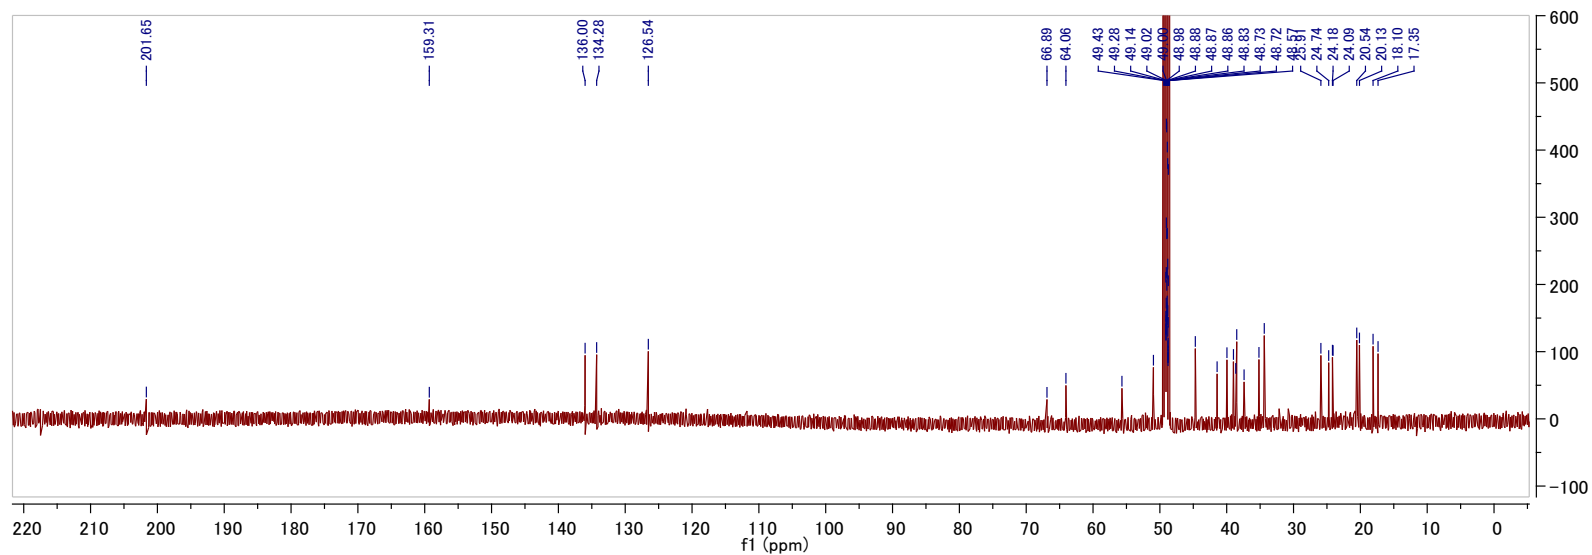

Figure S2:  $^{13}\text{C}$ -NMR spectrum of versisterol ( $\text{CD}_3\text{OD}$ , 150 MHz).

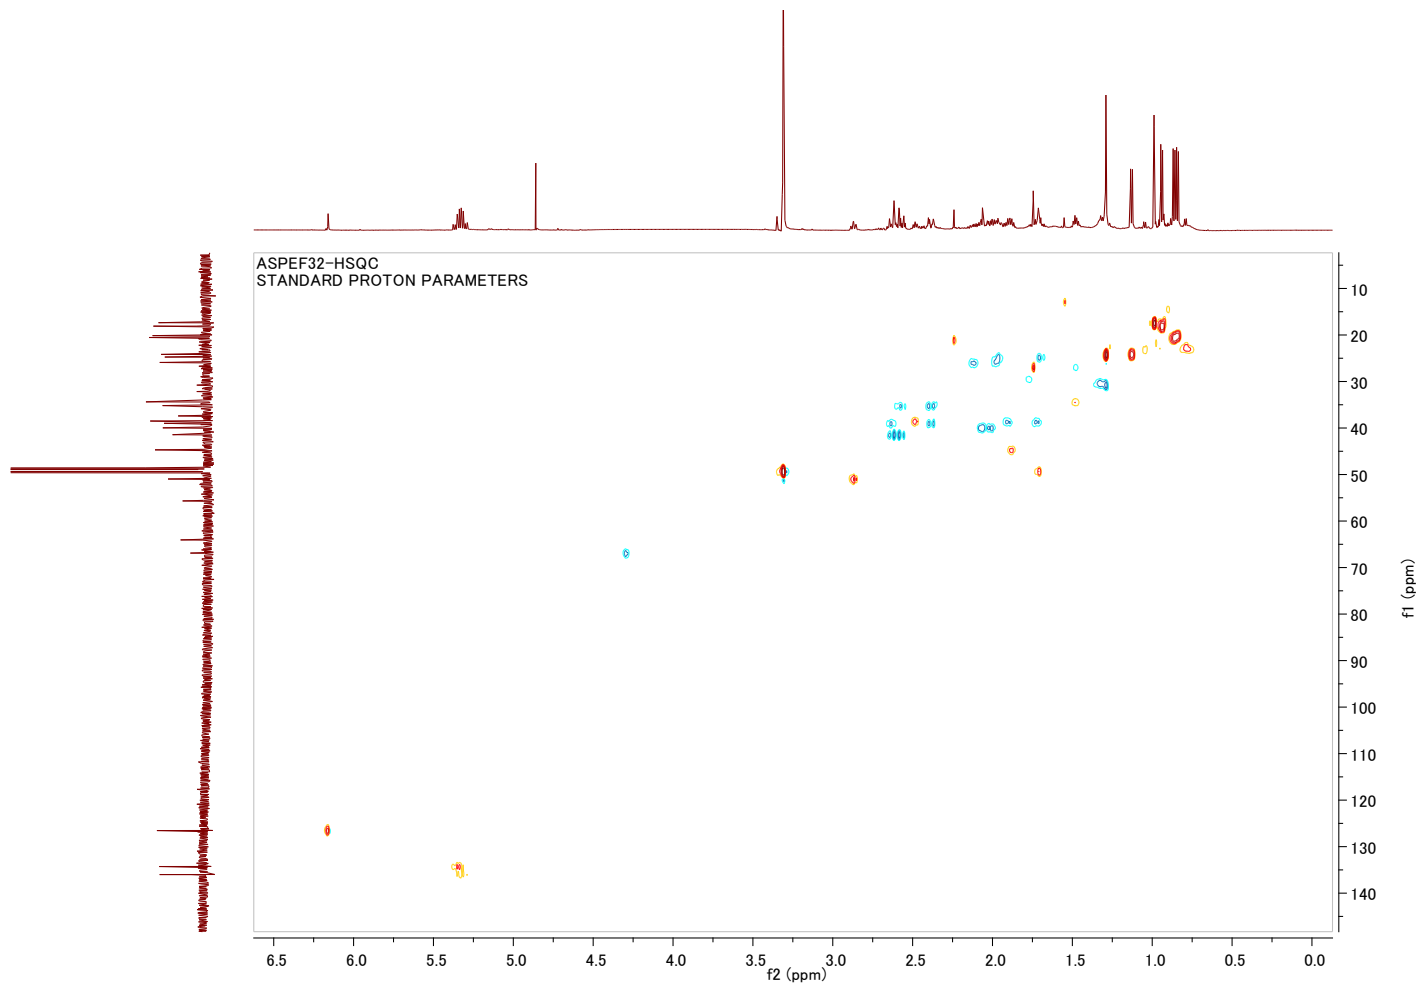

**Figure S3: HSQC of versisterol.**

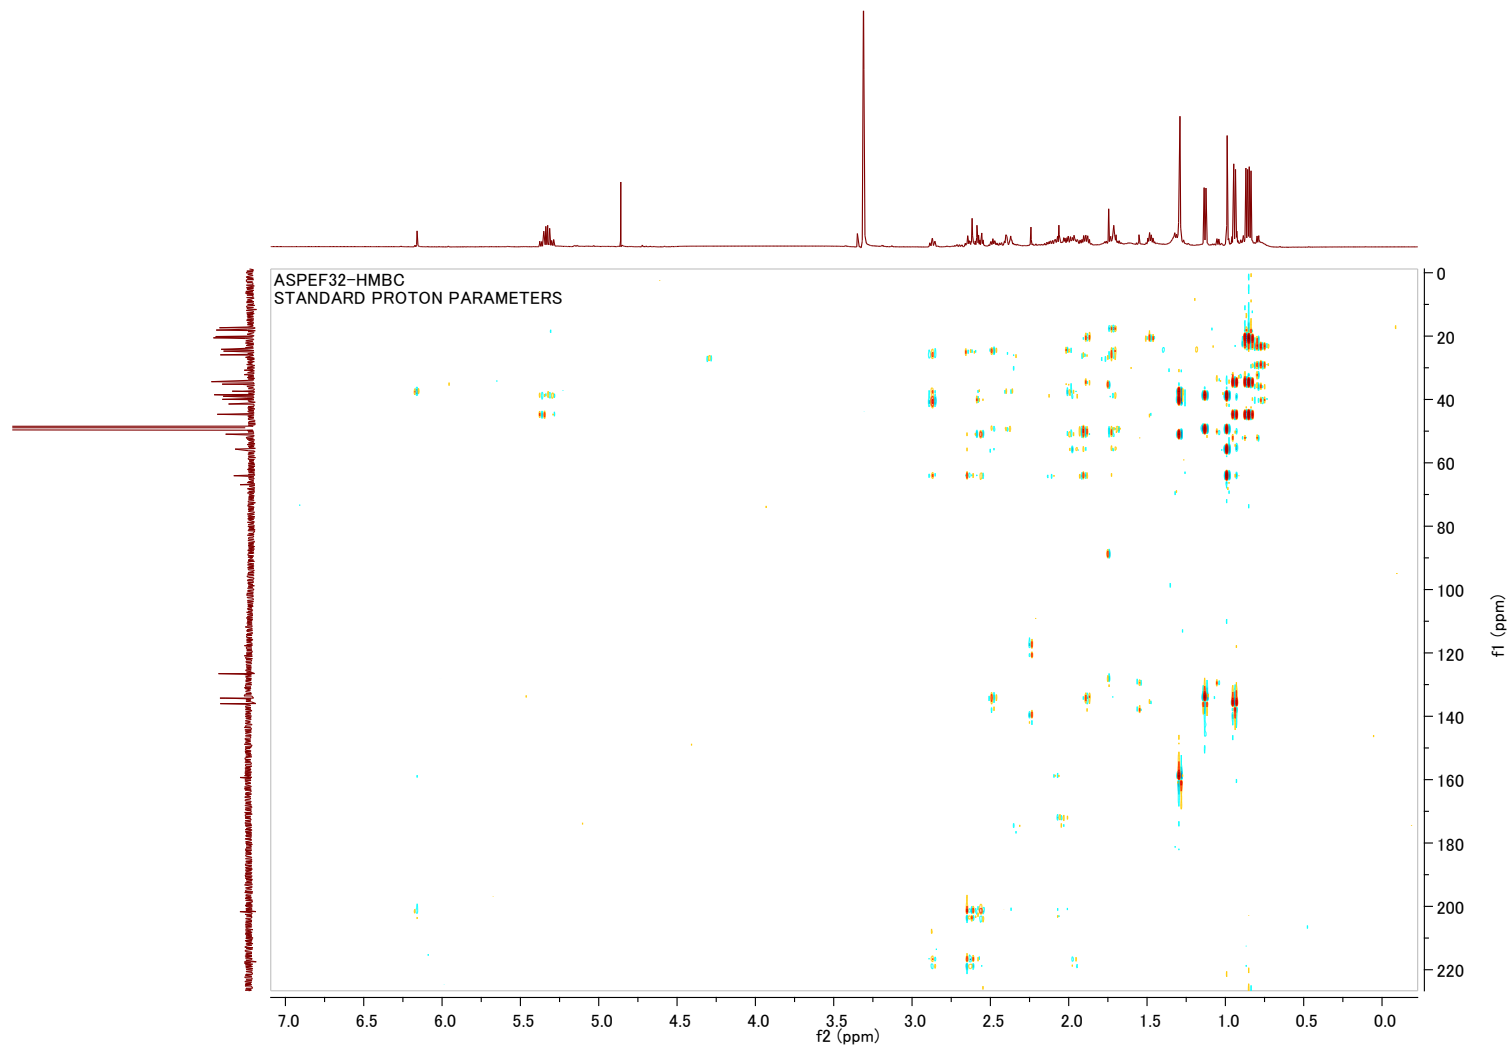

**Figure S4: HMBC of versisterol.**

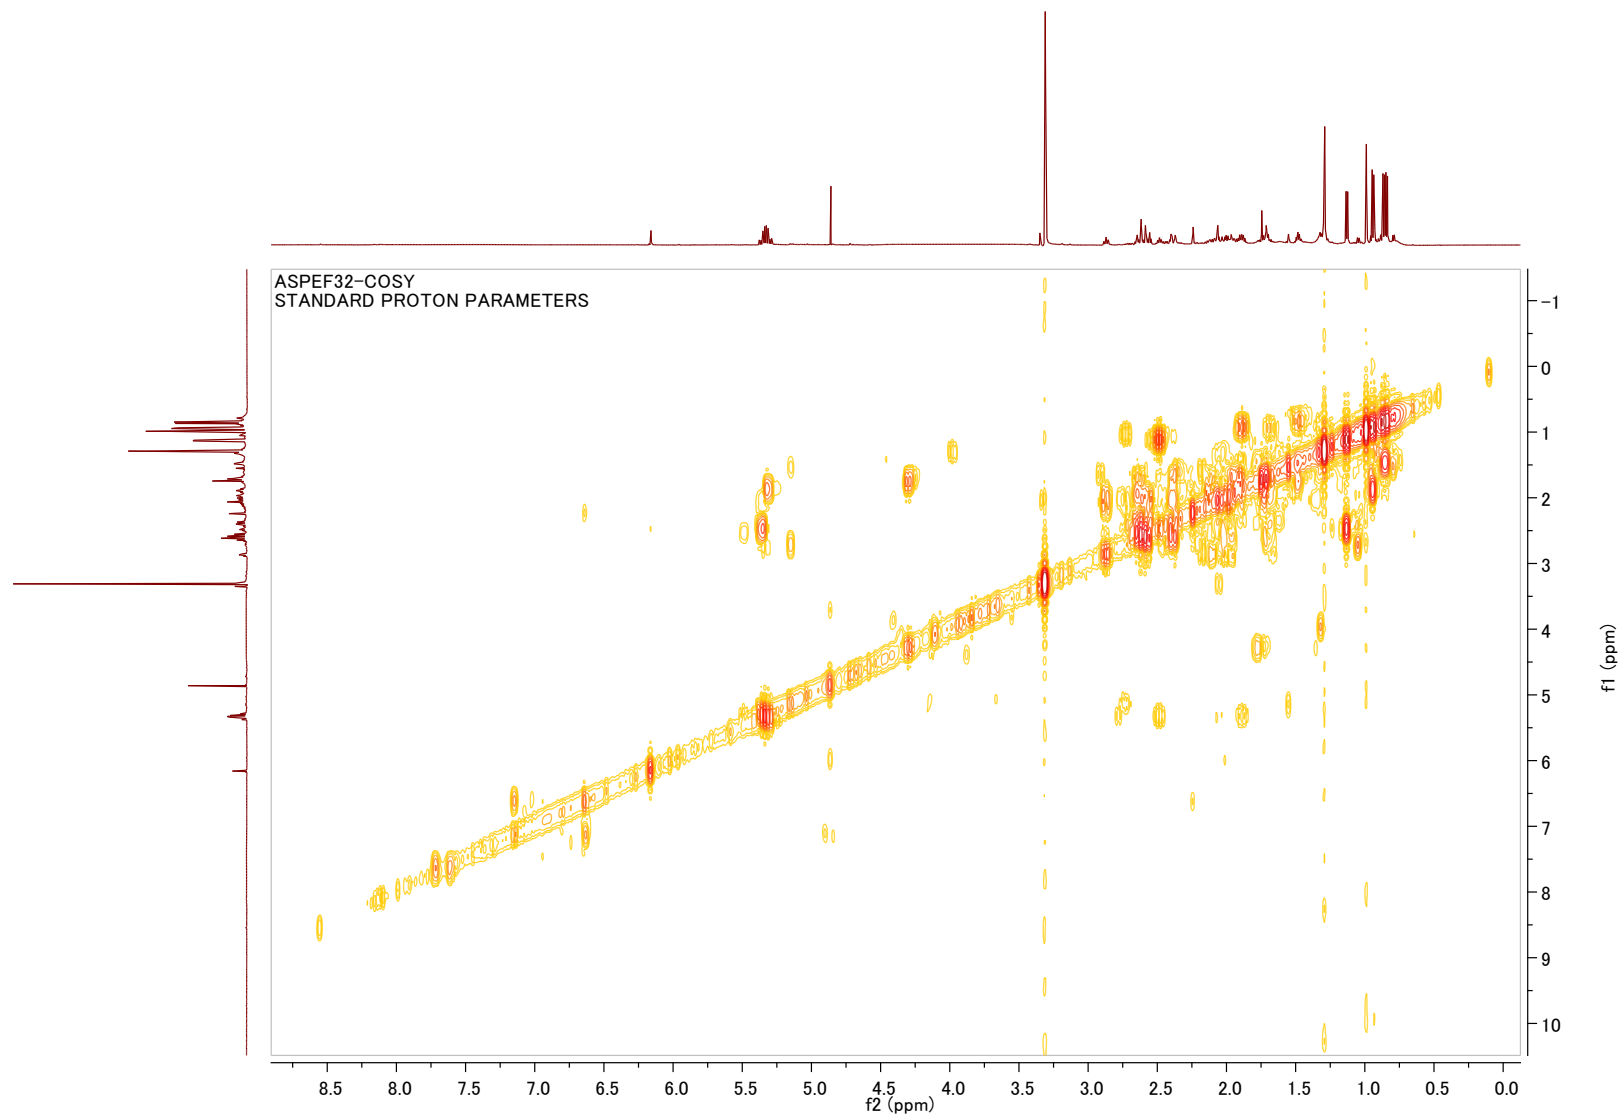

**Figure S5: COSY of versisterol.**

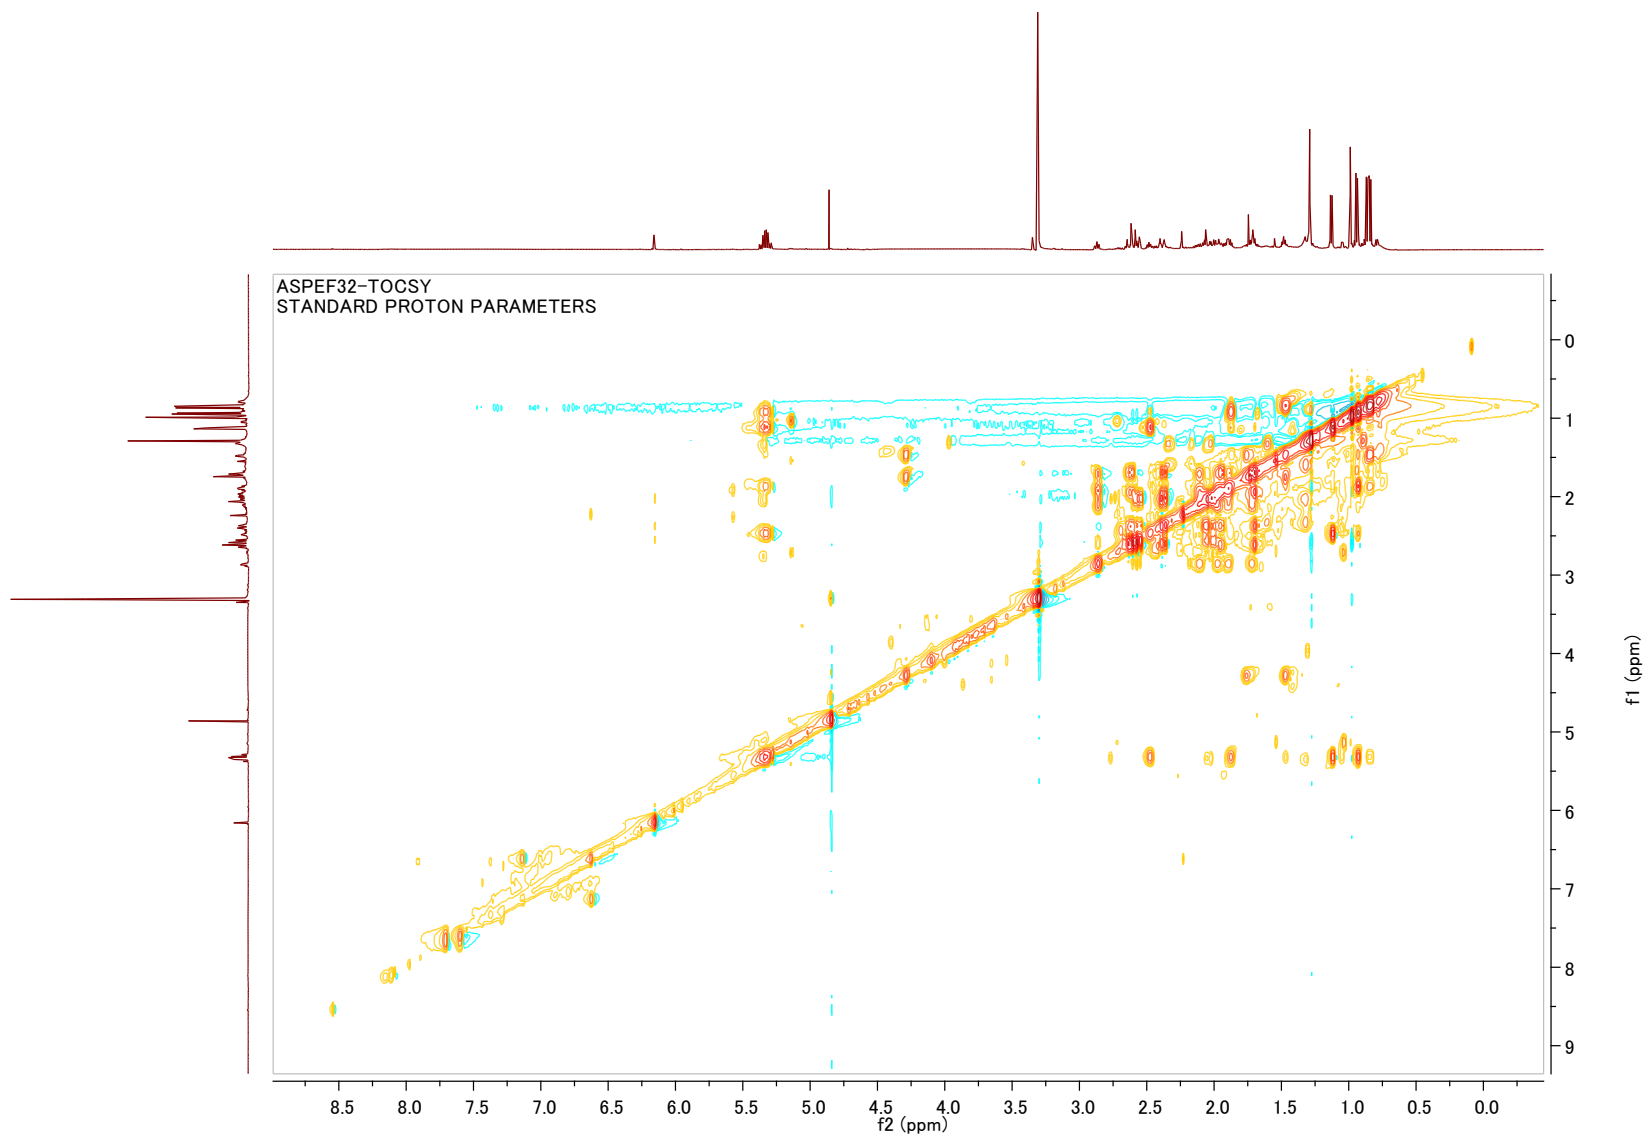

**Figure S6: TOCSY of versisterol.**



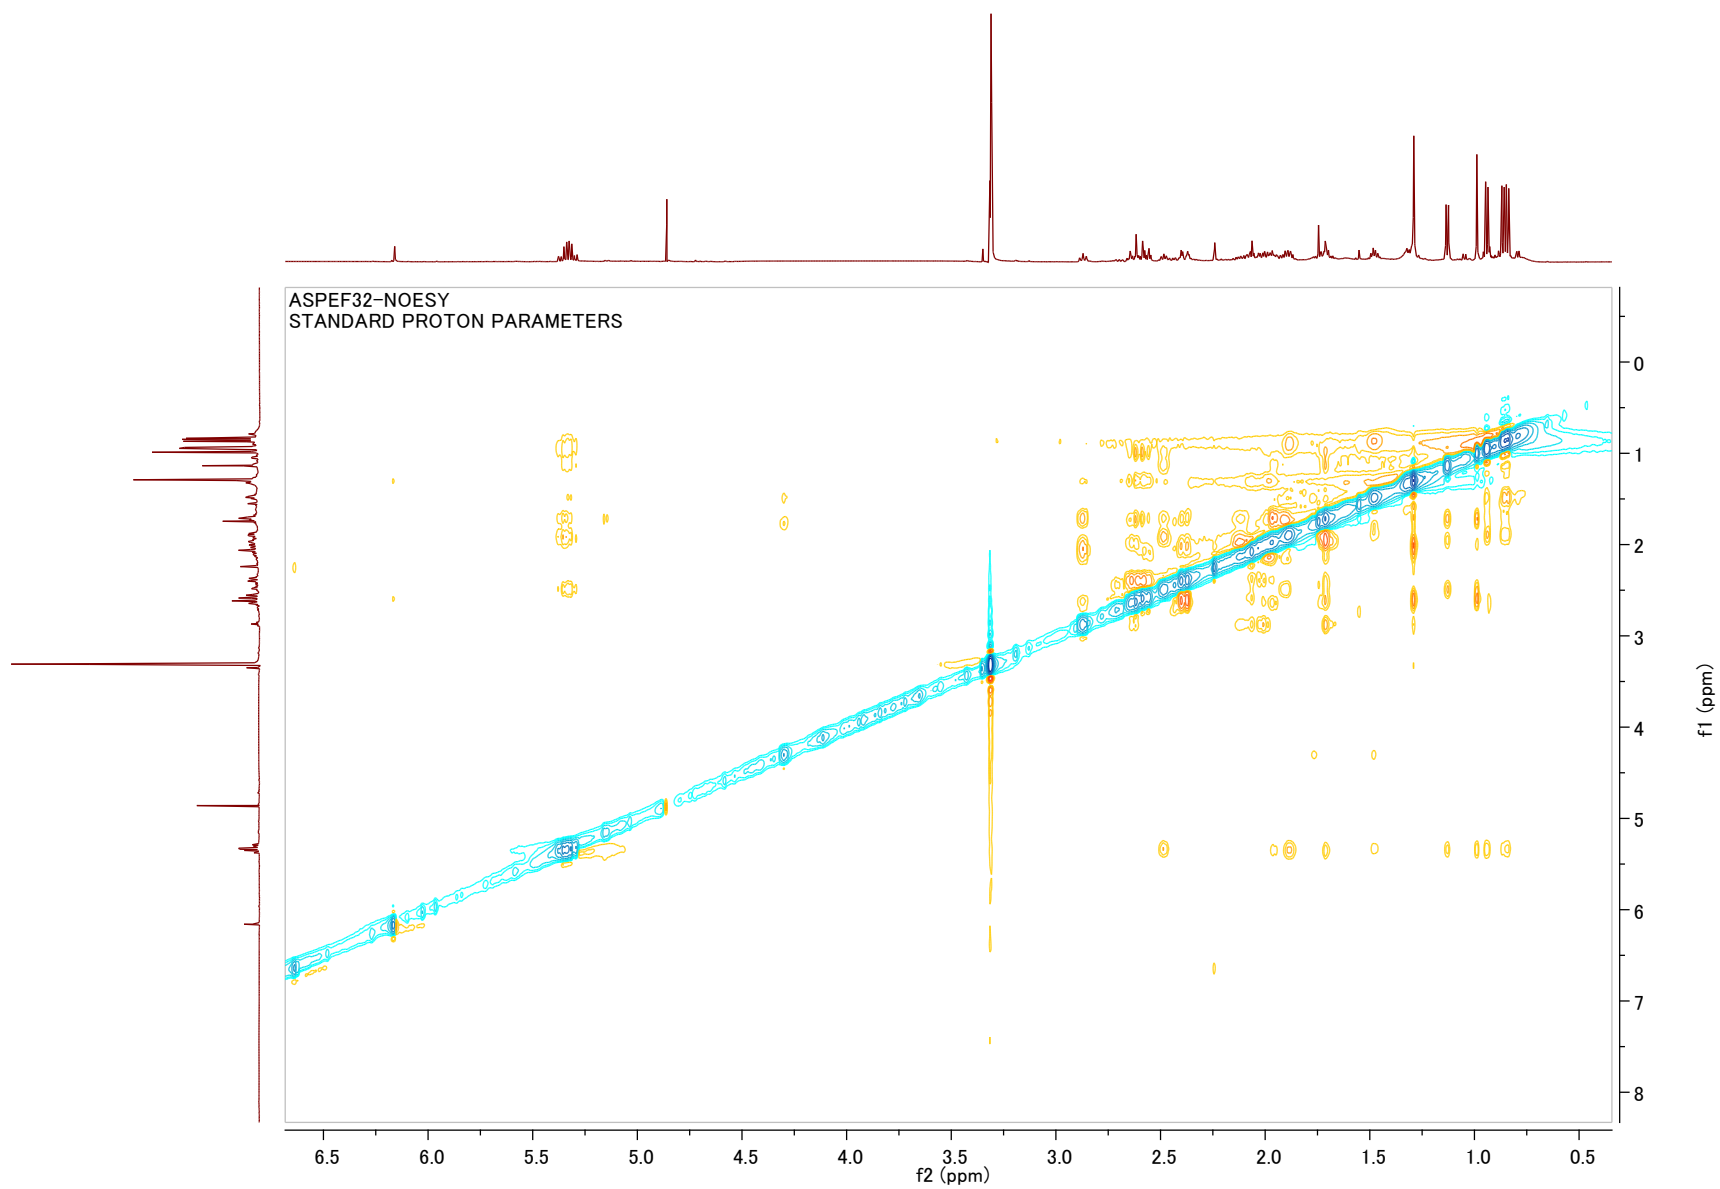

Figure S7: NOESY of versisterol.

## Mass Spectrum SmartFormula Report

|                      |                                        |                   |                     |       |
|----------------------|----------------------------------------|-------------------|---------------------|-------|
| <b>Analysis Info</b> |                                        | Acquisition Date  | 7/4/2018 4:06:50 PM |       |
| Analysis Name        | D:\Data\inpchem\20180704\EBE-3-2_pos.d | Operator          | BDAL                |       |
| Method               | esi_pos_wide.m                         | Instrument / Ser# | micrOTOF            | 10326 |
| Sample Name          | EBE-3-2                                | Comment           |                     |       |

|                              |            |                      |          |                  |           |
|------------------------------|------------|----------------------|----------|------------------|-----------|
| <b>Acquisition Parameter</b> |            |                      |          |                  |           |
| Source Type                  | ESI        | Ion Polarity         | Positive | Set Nebulizer    | 0.4 Bar   |
| Focus                        | Not active |                      |          | Set Dry Heater   | 200 °C    |
| Scan Begin                   | 150 m/z    | Set Capillary        | 4500 V   | Set Dry Gas      | 4.0 l/min |
| Scan End                     | 1500 m/z   | Set End Plate Offset | -500 V   | Set Divert Valve | Source    |

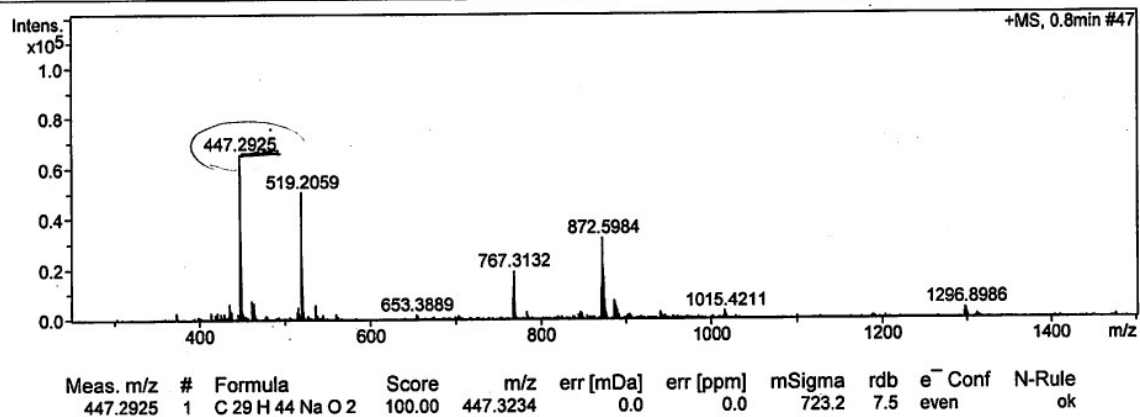

Figure S8: Positive HRES-ESI mass spectrum of versisterol.
